# Supplementary material
Source: publisher figshare collection journal article supplement (https://tandf.figshare.com/ndownloader/files/23101856)
Supplement: Supplementary file 1 [file 23101856]

Supplementary Material


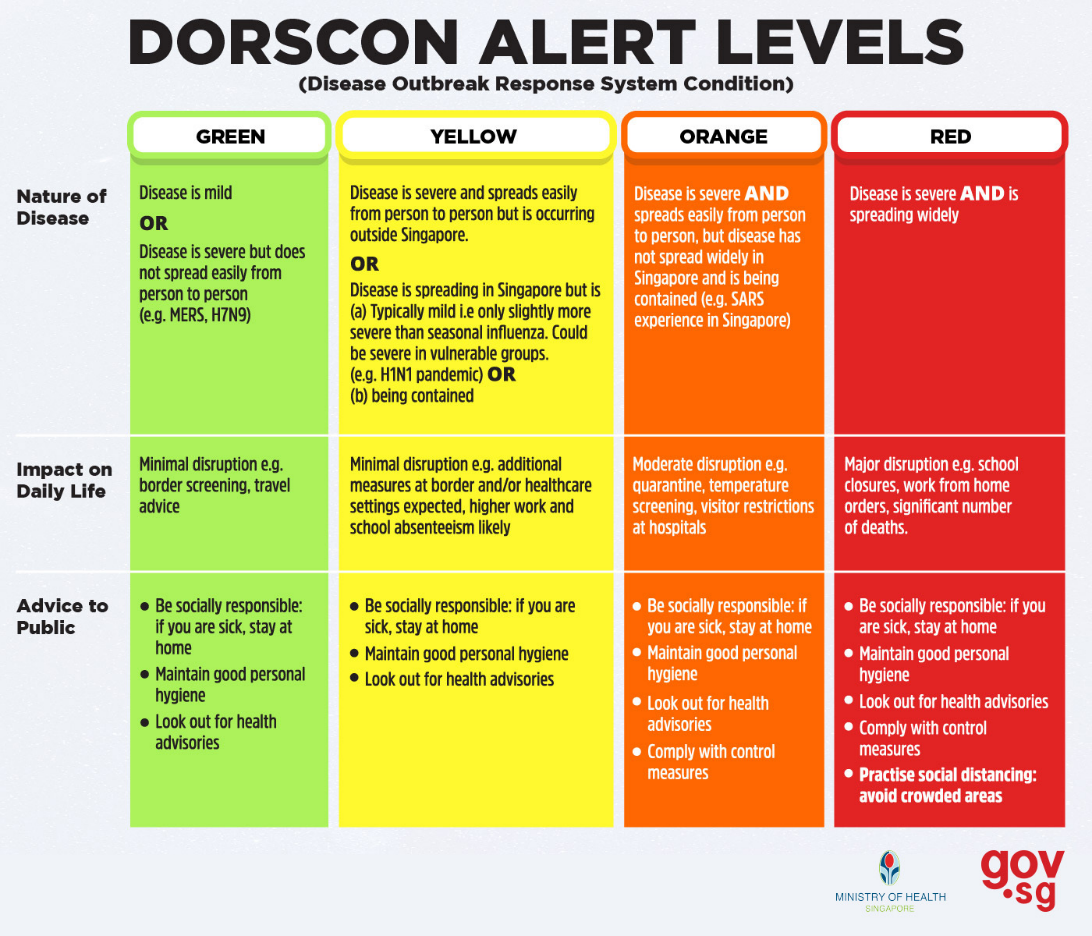


Supplementary Figure 1: Singapore Disease Outbreak Response System Condition8


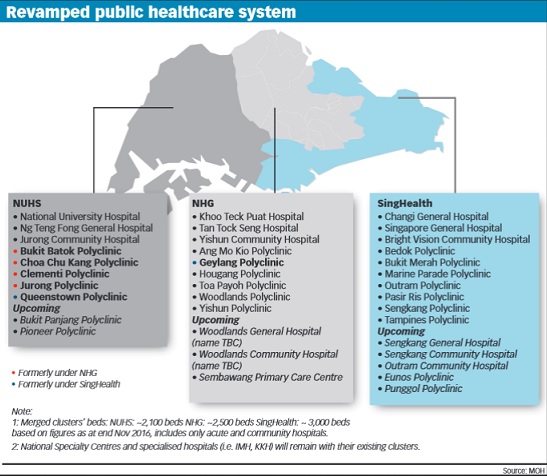


Supplementary Figure 2: – Singapore Public Health Care System Integrated Clusters7
